# Supplementary material for: Narrow mutational signatures drive acquisition of multidrug resistance in the fungal pathogen Candida glabrata
Source: PubMed Central journal article supplement — Curr Biol. 2021 Dec 6;31(23):5314–5326.e10. doi: 10.1016/j.cub.2021.09.084 (PMC8660101; doi:10.1016/j.cub.2021.09.084), 2021-12-06
Supplement: mmc1.pdf [file mmc1.pdf]

Current Biology, Volume 31

## Supplemental Information

**Narrow mutational signatures drive acquisition  
of multidrug resistance in the fungal  
pathogen *Candida glabrata***

**Ewa Ksiezopolska, Miquel Àngel Schikora-Tamarit, Reinhard Beyer, Juan Carlos Nunez-Rodriguez, Christoph Schüller, and Toni Gabaldón**

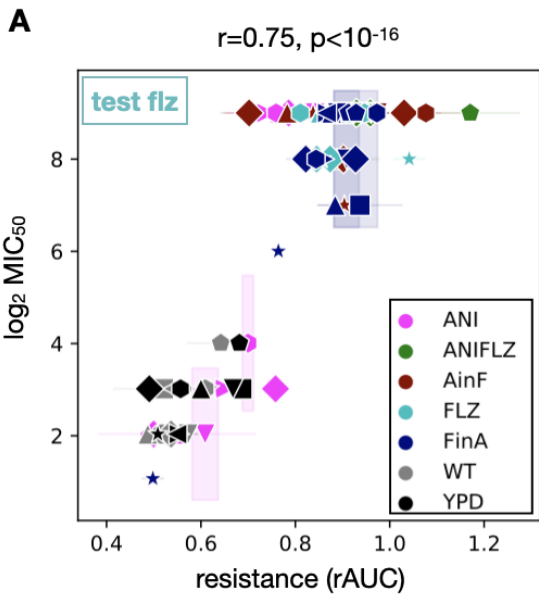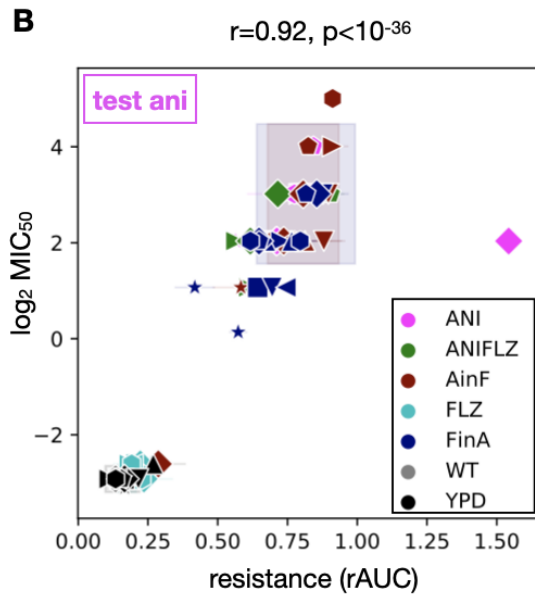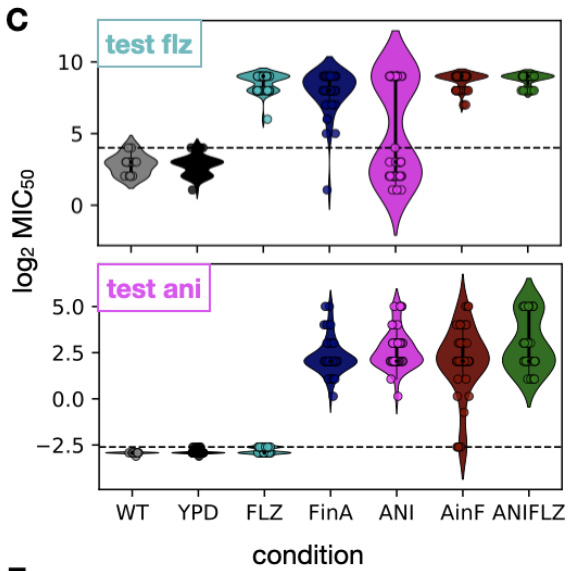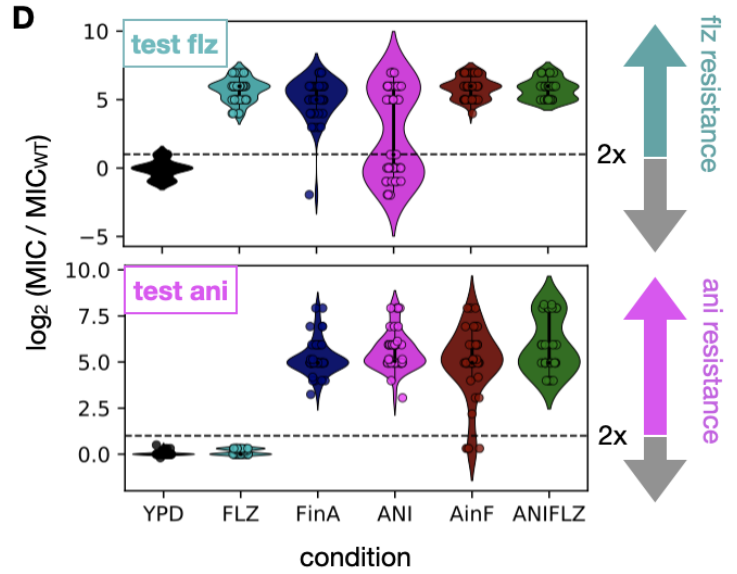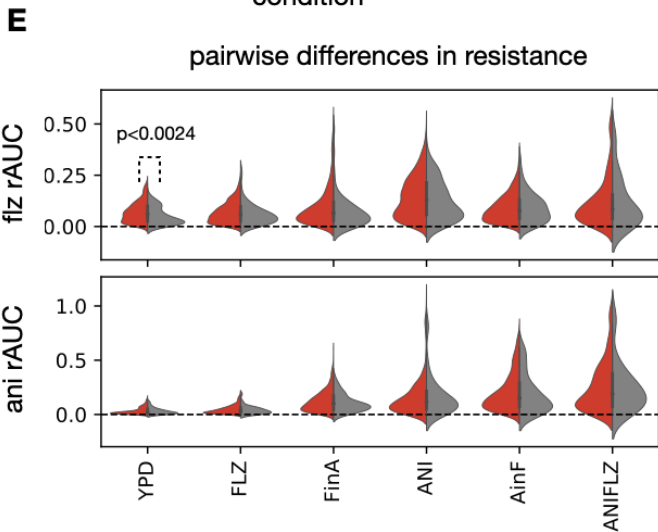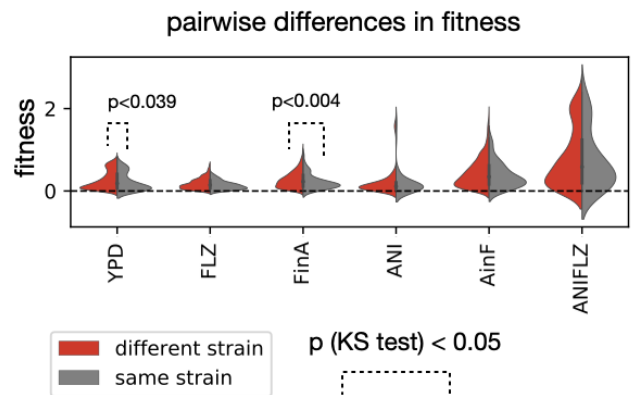

**Figure S1. Comparing Minimum Inhibitory Concentration (MIC) and rAUC. Related to Figure 2.**

(A) We compared the flz resistance levels estimated from rAUC and MIC<sub>50</sub>. The Spearman correlation coefficients and p-values are shown. Each point corresponds to a biological replicate and the error bars reflect the median absolute deviation across technical replicates. (B) The same as in (A) but for ani resistance. (C) MIC<sub>50</sub> for flz (top) and ani (bottom) was measured for all samples, presented here as single points. The dashed line indicates the maximum observed value in a YPD sample. (D) The increase in MIC relative to WT was calculated as the log<sub>2</sub> ratio of MIC of the sample and MIC of WT. Resistant samples are defined as those having a MIC twice as high as the corresponding WT (dashed line). (E) Investigating the repeatability of our *in vitro* evolution experiment. We measured the pairwise differences in flz susceptibility (top left), ani susceptibility (bottom left) and fitness (right) between evolved samples of the same (gray) or different (red) strains. The quantitative phenotypes shown in the y axis are similar to **Figure 2B,D**. The x axis shows the evolution condition. In order to test whether the evolution of these phenotypes is particularly repeatable across samples of the same strain we compared the distribution of different-strain (red) vs same-strain (gray) pairwise differences in each condition. This yielded significant differences ( $p < 0.05$  in a Kolmogorov-Smirnov (KS) test) for some comparisons, indicated with dashed lines.

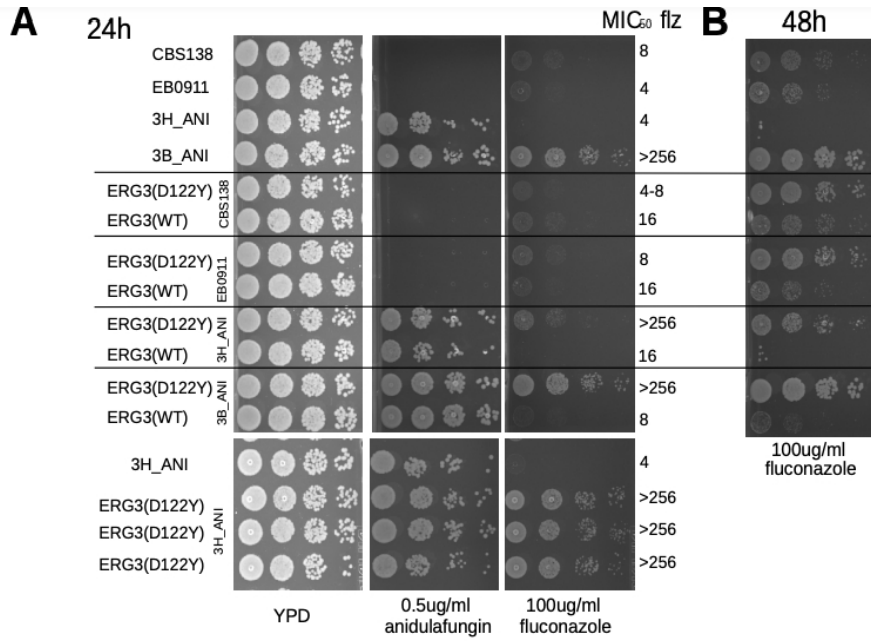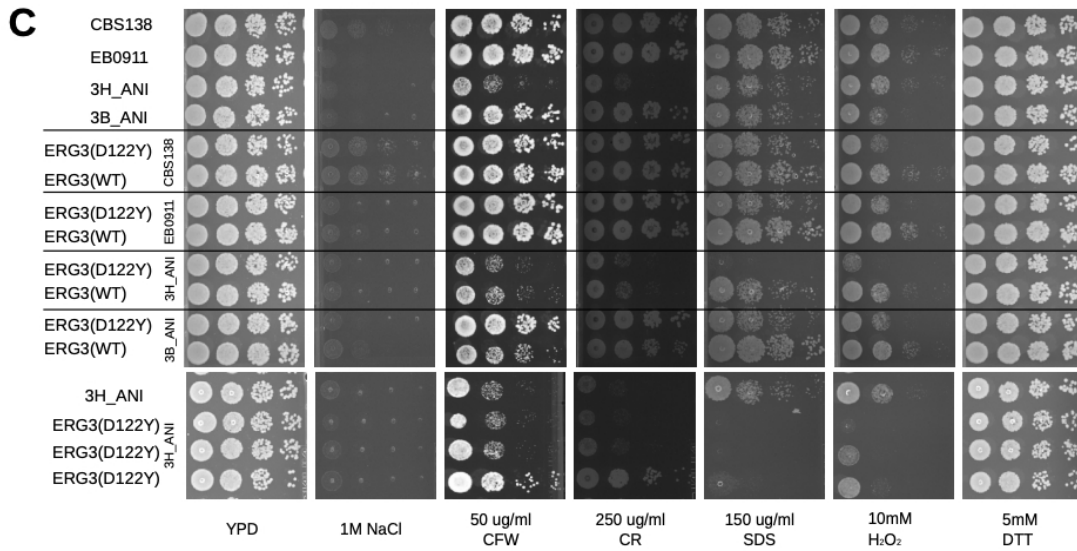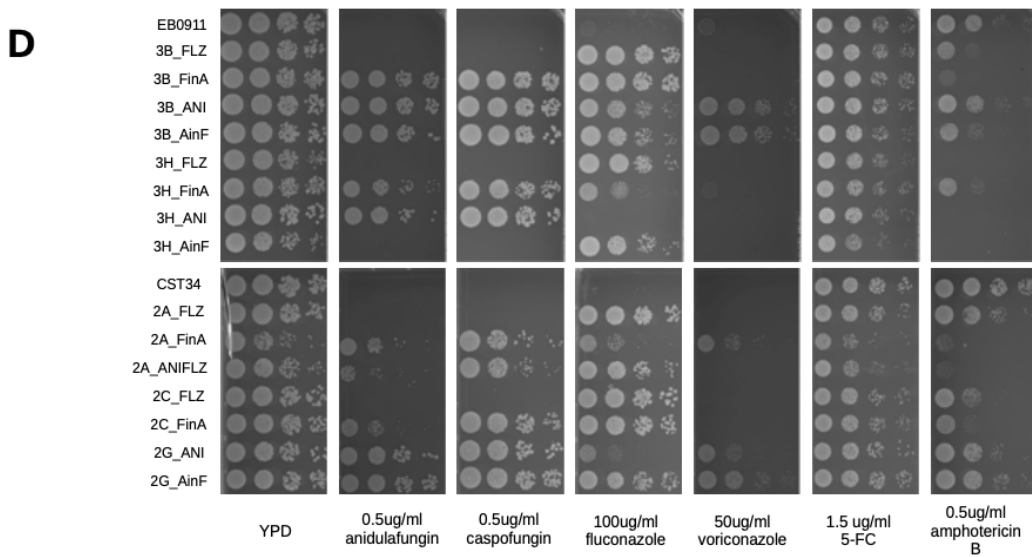

**Figure S2. Spot tests. Related to the samples with re-introduced *ERG3* mutations and susceptibility to a wide panel of drugs and STAR Methods.**

(A) Susceptibility of transformants carrying introduced changes in *ERG3* gene. Spot tests demonstrate changes in susceptibility (on a rich medium YPD supplemented with 100ug/ml flz and 0.5ug/ml ani) followed by EUCAST test after 24h incubation. The first four strains are the background strains used for the transformation: wild type *Candida glabrata* CBS138 and EB0911 as well as ani evolved progenies of EB0911: 3H\_ANI (susceptible to flz) and 3B\_ANI (bearing *ERG3* D122Y mutation and resistant to flz). The following spots represent the susceptibility of transformants carrying: *ERG3*(WT) or *ERG3*(D122Y) alleles fused with a *NATI* selection marker. The bottom panel shows three independent transformants carrying *ERG3*(D122Y) mutation inserted into an ani resistant strain (3H\_ANI) - 1. transformed with a long fragment with *ERG3* and crRNA\_ERG3\_1 and 2. and 3. are 2 different colonies obtained from a transformation with synthetic *ERG3* fragment and crRNA\_ERG3\_2. These transformants do not contain *NATI* gene and were selected on flz. Note that **Table S5** includes the list of used oligos. (B) presents a spot test of CRISPR transformants grown on flz and incubated for 48h. (C) shows susceptibility of *ERG3* CRISPR transformants to NaCl, Calcofluor White (CFW), Congo Red (CR), SDS, H<sub>2</sub>O<sub>2</sub> and DTT. (D) presents susceptibility of selected evolved mutants to anidulafungin, caspofungin, fluconazole, voriconazole, flucytosine (5-FC) and amphotericin B. Used concentrations are indicated in the figure.

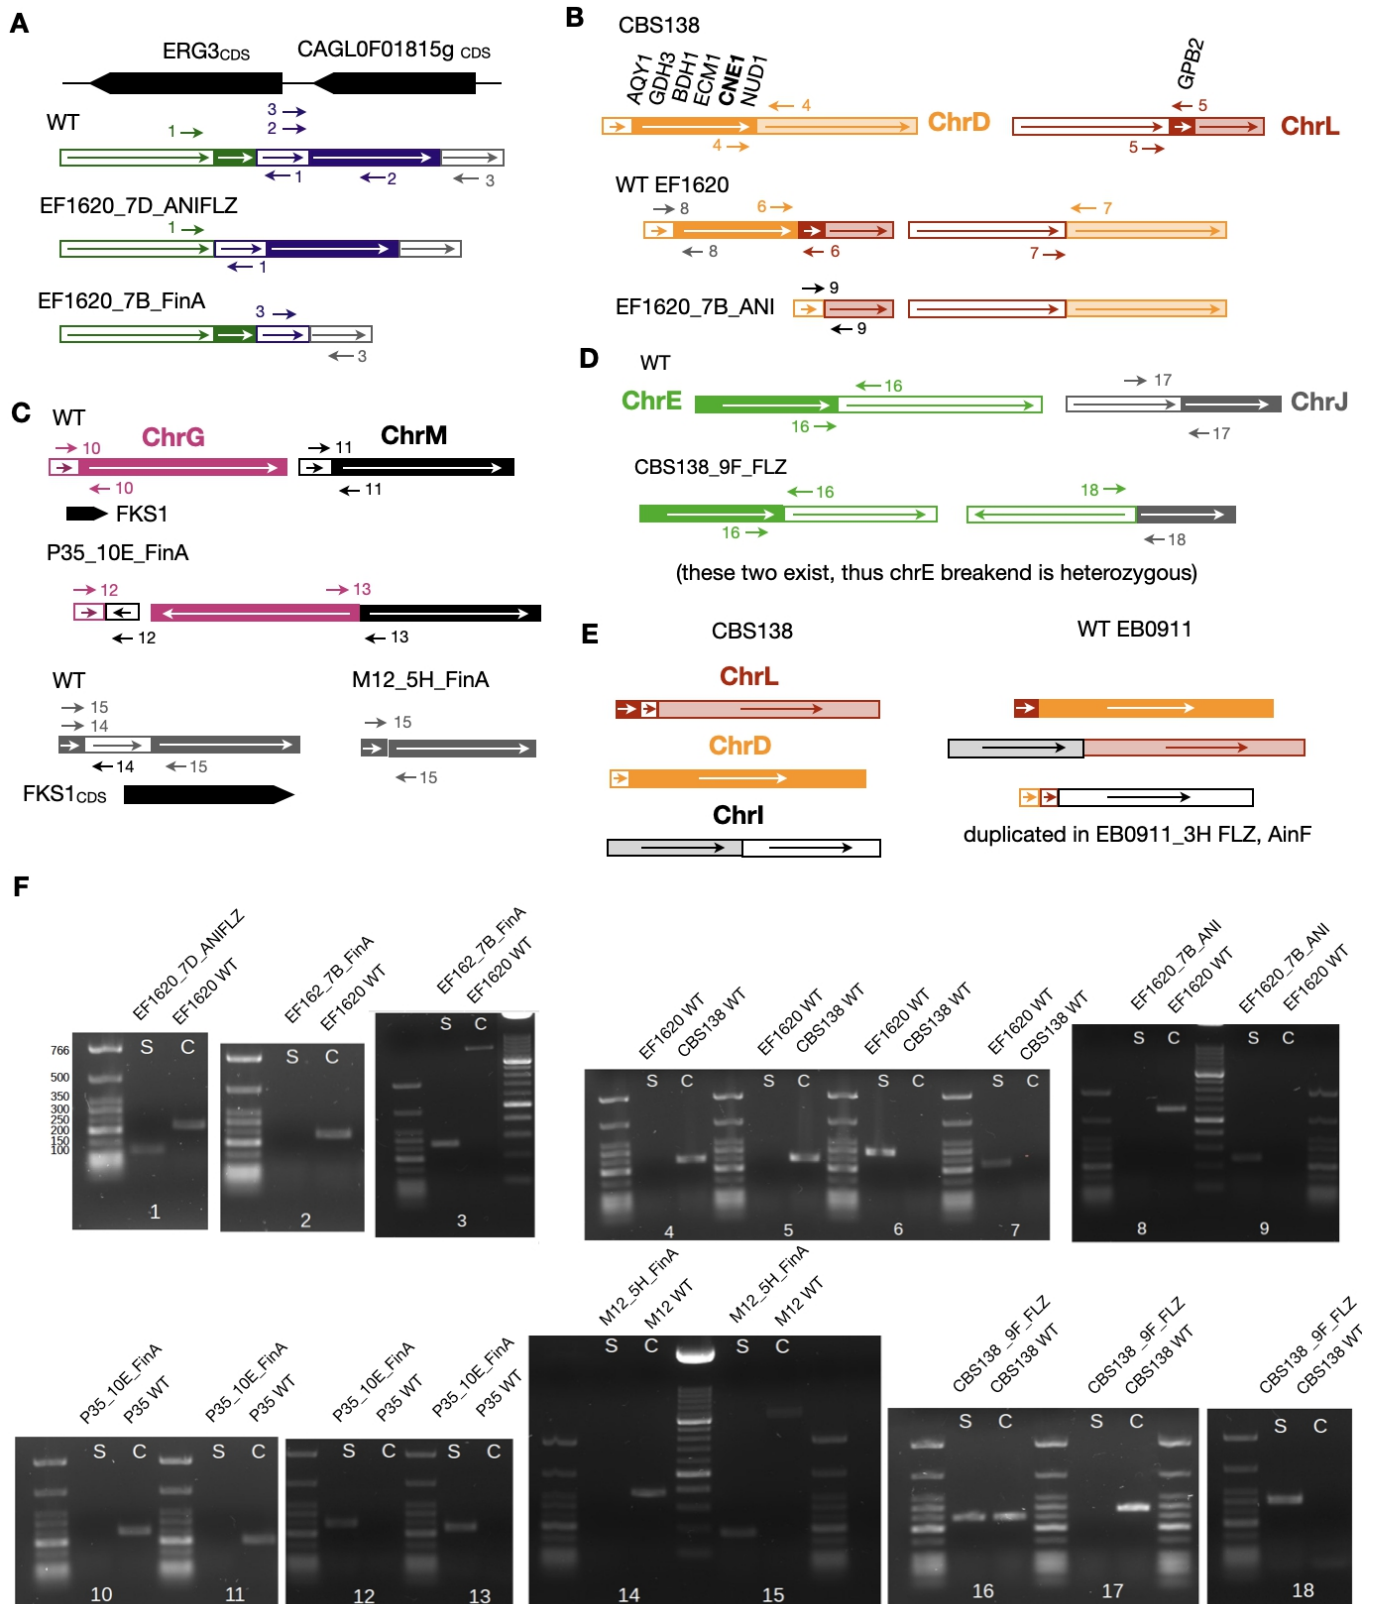

**Figure S3. Genomic rearrangements that appear during evolution in antifungal drugs. Related to Figure 6.**

(A) We found two samples with a deletion in the *ERG3* CDS (medium) and upstream region (bottom), respectively. The browser represents the genomic coordinates of *ERG3* and the upstream gene *CAGL0F01815g*. The boxes represent the WT regions that are rearranged in each sample. We confirmed these rearrangements with three PCRs on these samples (using primer pairs 1, 2 and 3). The results are

shown in (F), with the numbers matching the primer pairs of each PCR. **(B)** *CNE1* and *GBP2* were lost due to a single deletion rearrangement in EF1620\_7B\_ANI. The representation is analogous to (A), showing a EF1620 WT balanced translocation between Chr D and L which, in addition to the deletion-like breakpoint appearing in ANI, generates a loss of the region between the two breakpoints. **(C)** Two FinA samples carried rearrangements breaking the *FKS1* CDS (black box). P35\_10E\_FinA had an inverted balanced translocation between Chrs G and J (top), and M12\_5H\_FinA carried a partial deletion (bottom). **(D)** Genomic rearrangements can explain the partial Chr E aneuploidy in CBS138\_9F\_FLZ **(Figure 5A)**. This sample carried an unbalanced translocation between Chr E and J. Both Chr E breakends were heterozygous, while the Chr J breakend was haploid. **(E)** The apparent partial duplication of Chr I **(Figure 5A)** is actually a complete aneuploidy in two EB0911 samples. We found WT balanced translocations between these chromosomes that result in three mixed chromosomes in this strain (bottom). We found that two EB0911\_3H samples had one of these mixed chromosomes duplicated (bottom), including mostly half of the reference Chr I. **(F)** We performed PCRs using primer pairs around the rearrangements (1 to 18 in **(A)** - **(D)**) to confirm them. These primers can be found in **Table S5**. Each PCR was carried on a given sample and the corresponding control. We note that we could obtain bands with the expected sizes in all samples.

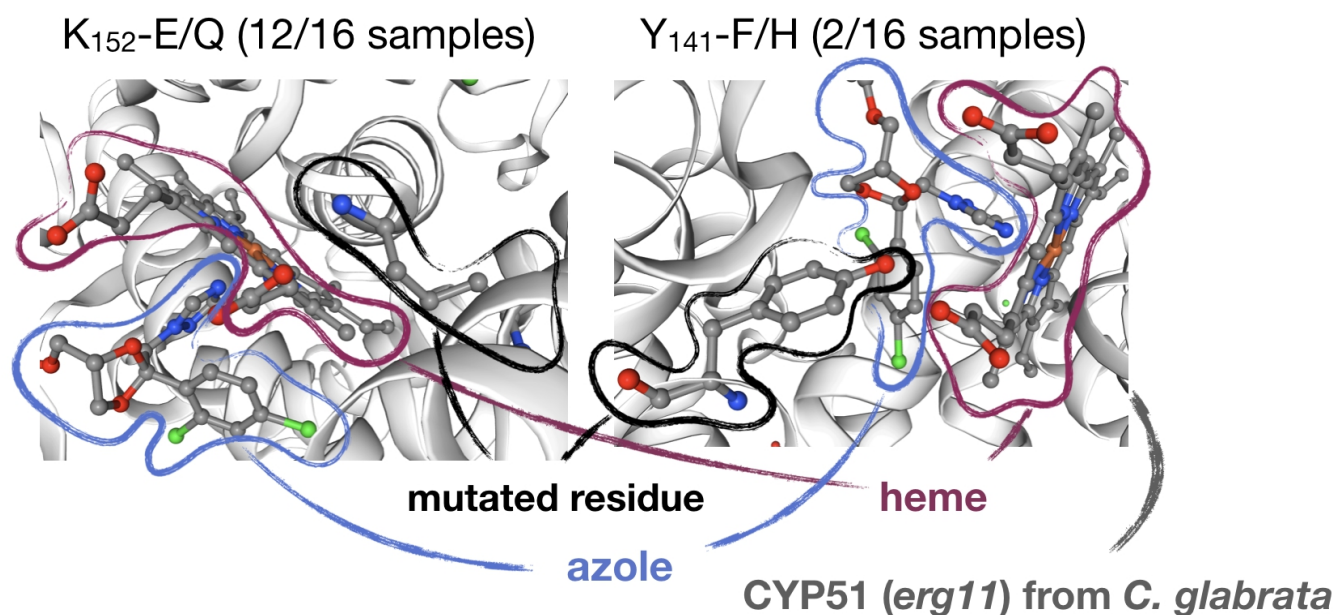

**Figure S4. Structural localization of frequent *ERG11* mutations. Related to Figure 6.**

Given the availability of a characterized 3D structure for Erg11p in contact with azoles (pdb id: 5JLC) we inspected the location of recurrently mutated residues and found that they are close to the azole binding pocket. The structure (pdb id: 5JLC) was visualized using SWISS MODEL<sup>S1</sup>. A screenshot of the two residues in the context of itraconazole and a heme group is shown. The basic group of K152 is close to an acid group in heme, potentially establishing an electrostatic interaction that is important for stability. Importantly, Y141 is conserved with Y132, a position that has been mutated in various other azole resistant *Candida* species<sup>S2-S4</sup>. As a possible mechanism of resistance, we hypothesize that the substitution by E or Q destabilizes this interaction, thereby impairing the binding of azoles.



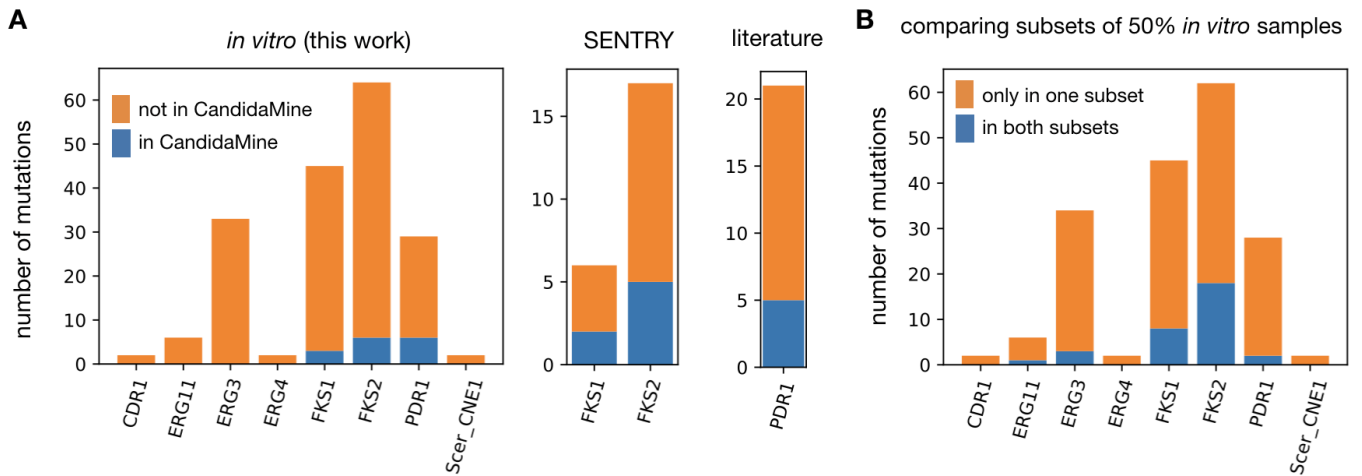

**Figure S5. The overlap between drug resistance-conferring mutations from different studies in *Candida glabrata*. Related to the analysis of clinical isolates' sequencing datasets in STAR Methods.**

(A) We compared the drug resistance variants described in this work (left), the SENTRY database (middle<sup>S5</sup>) and a set of described *PDR1* mutations (right<sup>S6-S8</sup>) against those in clinical isolates with available whole genomes (393 in total) (see **STAR Methods**). Shown is the number of mutations that are found in each study and in some (blue) or no (orange) clinical isolates. (B) In order to estimate the expected overlap between drug resistance mutations among different samples, we implemented a randomised strategy from our own experiments. We divided the samples carrying mutations in a given gene into two random subsets. For each subset, we calculated the number of mutations only in the subset or also found in the other subset. This process was repeated 100 times, and shown is the median number of mutations not shared (orange) or shared (blue) across subsets.

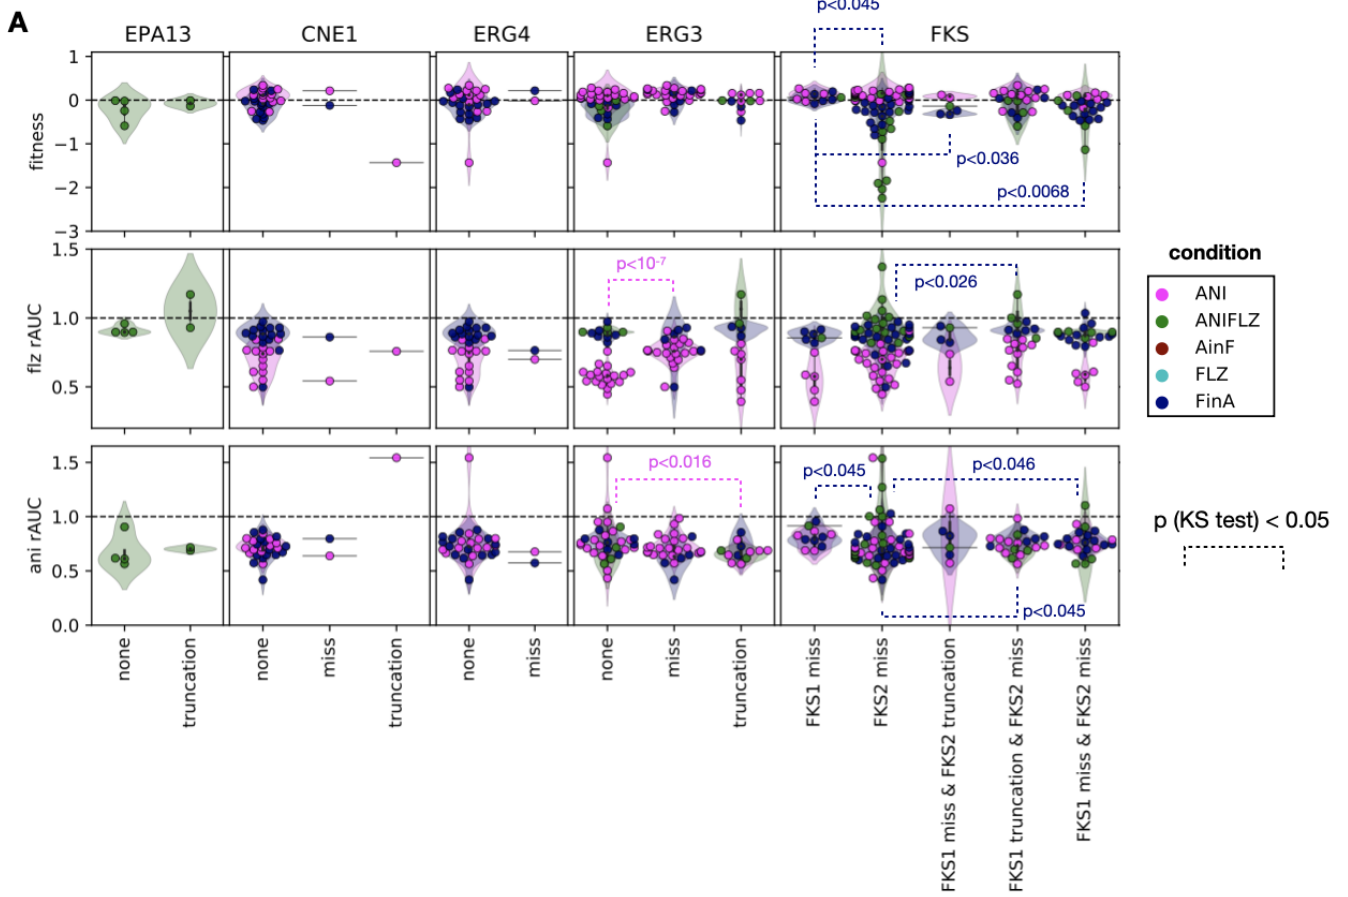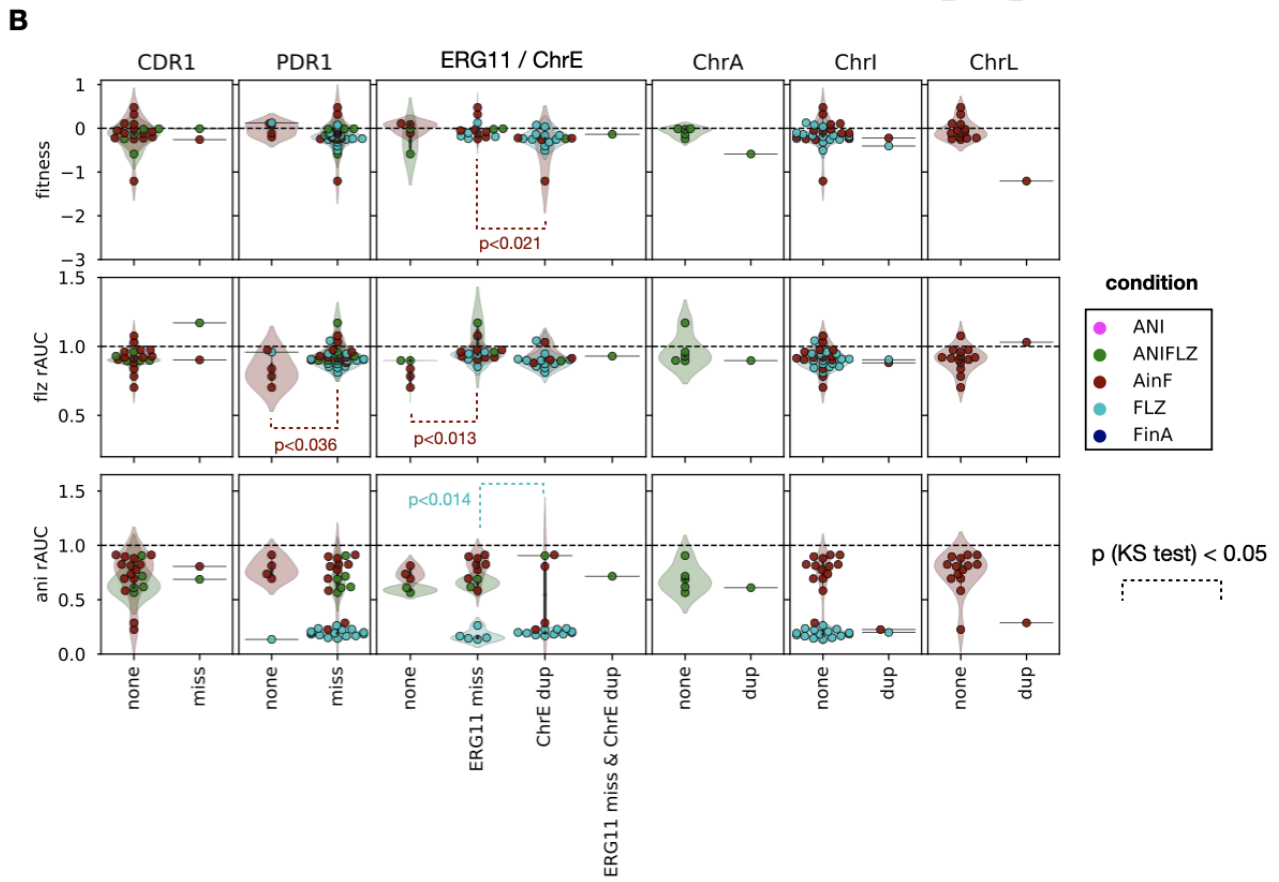

**Figure S6. Genotype-phenotype relationship in the evolved samples. Related to Figures 2 and 6.**

(A) Similar mutations in genes altered during evolution in ani seldom modulate fitness (top), flz susceptibility (medium) or ani susceptibility (bottom). The y axis shows each quantitative phenotype as in **Figure 2B,D**. Each point represents one *in vitro*-evolved sample and the color indicates the condition. The x axis shows whether each sample has no mutations (“none”), missense mutations (“miss”) or truncating mutations (“truncation”) in the given gene. In addition, we separate the samples by *FKS1/FKS2* mutation status (right panel) in order to show how different combinations of mutations in these genes may affect each phenotype. We compared the phenotypes for each of the condition/mutation type combinations in a pairwise manner with a Kolmogorov-Smirnov (KS) test to find significant differences between the groups. The dashed lines correspond to comparisons with a  $p < 0.05$ . (B) The same as in (A), but for genes / chromosomes mutated during evolution in flz. The “ERG11 / ChrE” panels shows these phenotypes for different combinations of *ERG11* missense mutations and Chr E duplications (“ChrE dup”). The samples in the rightmost three panels are separated by the absence (“none”) or presence (“dup”) of chromosomal duplications.

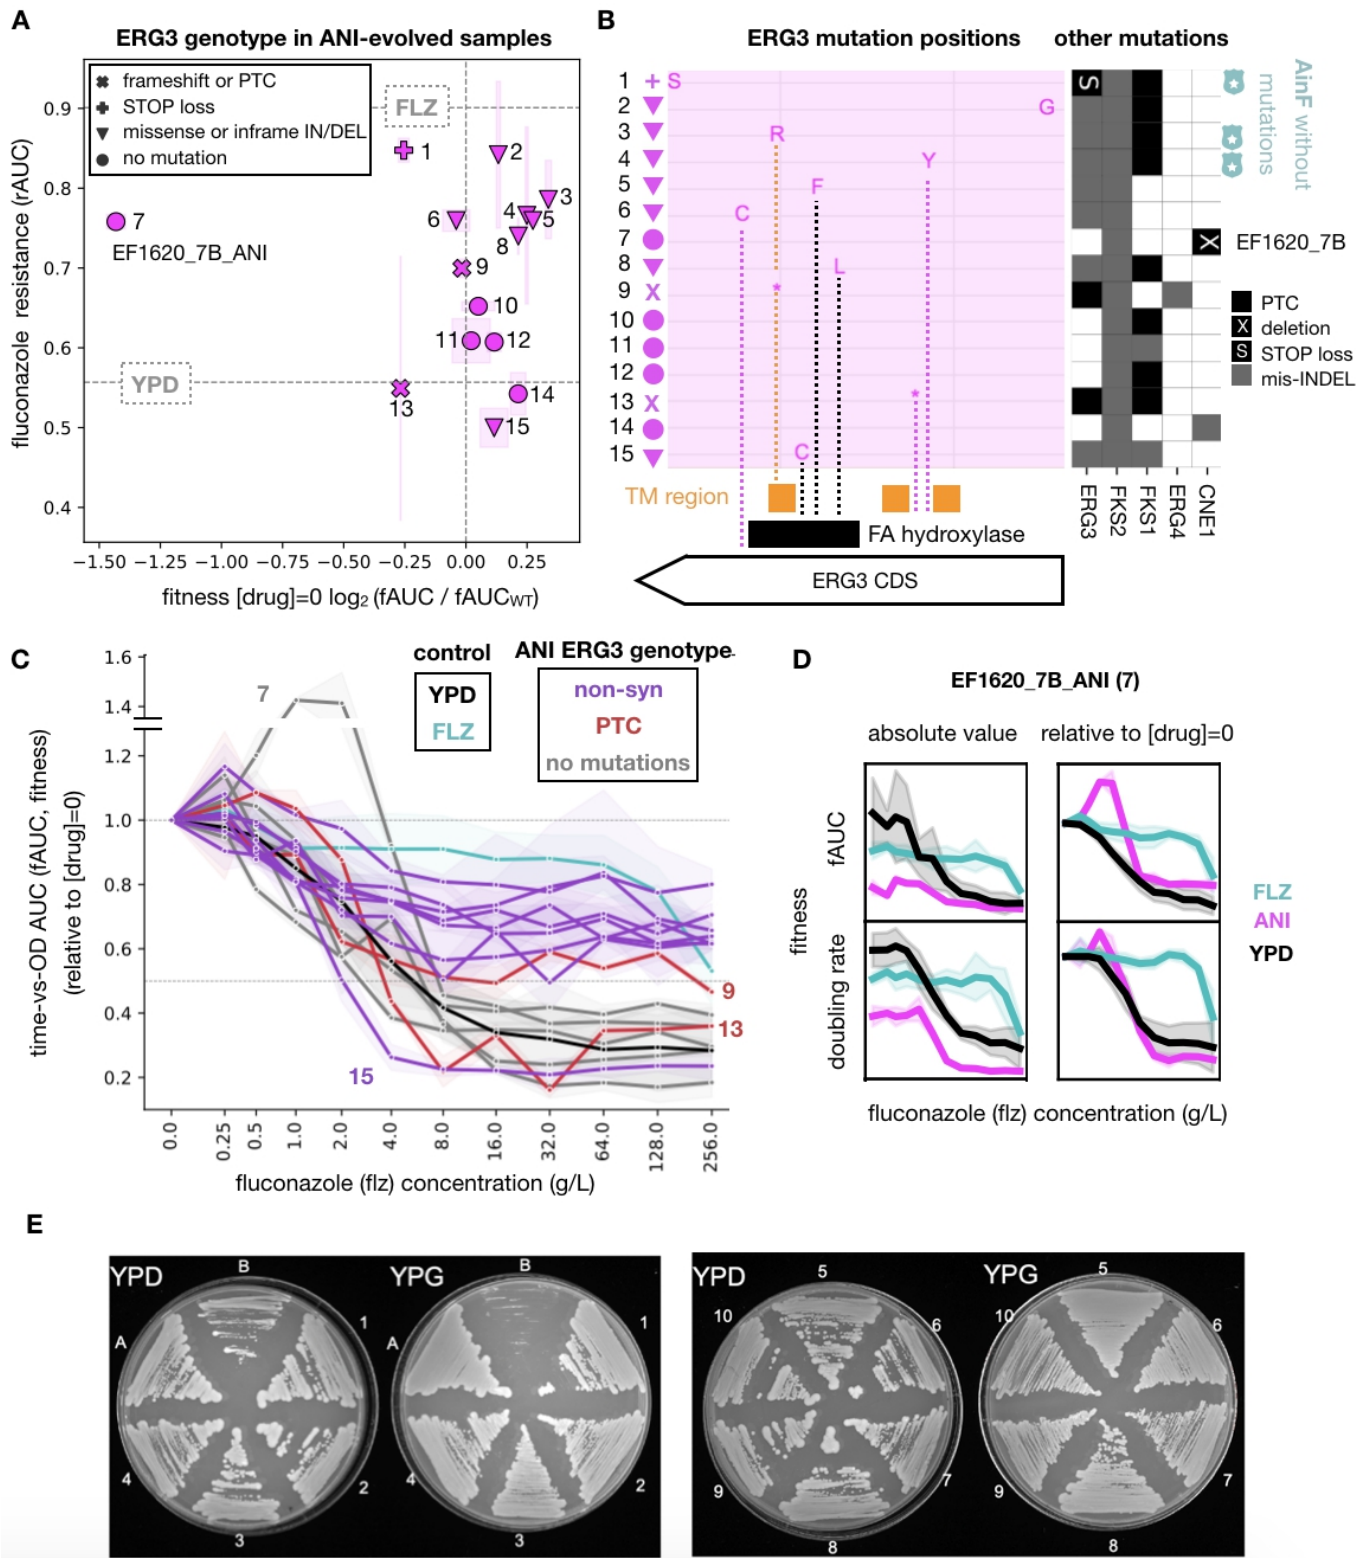

**Figure S7. Acquisition of *ERG3* mutations in ANI samples and fluconazole cross-resistance. Related to Figure 7.**

(A) Fitness (relative to the WT as in Figure 2D) is high in most ANI-evolved samples (EF1620\_7B\_ANI is an exception), while flz-resistance (shown as rAUC) is variable. The symbols correspond to different types of *ERG3* protein-altering mutations. The dashed lines correspond to the median flz rAUC for all the FLZ and YPD samples. Each point represents the median across technical replicates for a given sample, while the boxes show the median absolute deviation. The numbers are related to the order of flz-

resistance used to show the relationship of each sample to panels (B), (C) and (D). **(B)** *ERG3* amino acid mutations are scattered throughout the coding region of the gene. The boxes in the bottom represent annotated protein domains (see **STAR Methods**), where the “catalytic domain” is the Fatty acid (FA) hydroxylase superfamily (PF04116) and TM are transmembrane regions. Three samples with no additional mutations nor increase in flz resistance in subsequent flz treatment (AinF) are marked with blue shields. PTC and ‘\*’ indicate Premature Termination and S indicates the loss of the STOP codon. **(C)** Growth of the ANI samples (with colored *ERG3* genotype) at increasing concentrations of flz shown as fAUC and compared to all FLZ (blue) and YPD (black) samples. Purple lines indicate samples with non-synonymous alterations, red - with protein termination codon (PTC) and gray - no *ERG3* changes. Samples 9 and 13 bear a PTC but the former showed improved growth at higher flz concentrations. Although assessed as susceptible based on MIC, sample 9 presented a growth curve more similar to that of resistant samples, and maintained a relative growth around ~50% across increasing concentrations (see **Analysis of MIC and rAUC measures for antifungal drug resistance in STAR methods**). Sample 15 bears the only ns mutation that did not result in increased resistance to flz by rAUC, MIC or shape and position of the growth curve. The points and error bars correspond to the median and median absolute deviation for each assayed concentration in each sample, respectively. The numbers (7, 15, 9, 13) correspond to those in (A) and (B). **(D)** EF1620\_7B\_ANI (number 7 in this figure) was found to be susceptible to flz according to our MIC-based thresholding (**Figure S1C,D**) but depicted an rAUC in the range of resistant samples (A). To understand this mismatch, we studied the quantitative relationship between flz concentration and several fitness estimates (the doubling rate per hour (bottom) and fAUC (top)) in both absolute (left) and relative to no drug (right) representations. The median values across all FLZ and YPD EF1620 samples are shown for comparison. **(E)** Petite phenotype assessment. Growth of ANI evolved mutants (1. 2G\_ANI, 2. 3B\_ANI, 3. 5F\_ANI, 4. 7D\_ANI, 5.7F\_ANI, 6. 9F\_ANI, 7. 9H\_ANI, 8. 10G\_ANI, 9. 11G\_ANI, 10. 11H\_ANI), CBS138 (A) and petite *S. cerevisiae* mutant (B), on YP medium supplemented with glucose (YPD) and glycerol (YPG).

| Systematic name     | Standard name or ortholog | CST109       | M12          | description                                                                                                                                                                                      |
|---------------------|---------------------------|--------------|--------------|--------------------------------------------------------------------------------------------------------------------------------------------------------------------------------------------------|
| CAGL0C05313g        | -                         | N547H        | M206V        | Protein of unknown function                                                                                                                                                                      |
| CAGL0B01166g        | SWI6                      | A246T        | R414K        | Ortholog(s) have DNA-binding transcription activator activity, RNA polymerase II-specific, RNA polymerase II proximal promoter sequence-specific DNA binding, transcription coactivator activity |
| CAGL0E03564g        | Scer_CDC3                 | K383R        | I278M        | Ortholog(s) have GTP binding, phosphatidylinositol-4-phosphate binding, phosphatidylinositol-5-phosphate binding, structural molecule activity                                                   |
| CAGL0G01430g        | Scer_LAP2                 | N469S        | P222S        | Ortholog(s) have aminopeptidase activity, epoxide hydrolase activity and role in cellular lipid metabolic process, protein catabolic process, protein localization by the NVT pathway            |
| <b>CAGL0H03179g</b> | <b>Scer_MAD1</b>          | <b>Y390H</b> | <b>D387N</b> | <b>Ortholog(s) have protein-containing complex binding activity</b>                                                                                                                              |
| CAGL0H09130g        | Scer_MNN4                 | R573Stop     | P734A        | Ortholog(s) have enzyme activator activity and role in fungal-type cell wall polysaccharide biosynthetic process, protein N-linked glycosylation, protein O-linked glycosylation                 |
| CAGL0H02255g        | Scer_RSN1                 | E709G        | I787M        | Ortholog(s) have role in Golgi to plasma membrane transport and membrane localization                                                                                                            |
| CAGL0J07326g        | Scer_SQS1                 | Q359L        | D533E        | Ortholog(s) have role in mRNA splicing, via spliceosome, maturation of SSU-rRNA, positive regulation of ATPase activity, positive regulation of helicase activity                                |

**Table S1. List of shared polymorphisms found in CST109 (clade 1) and M12 (clade 3) that were not found in other representatives of their respective clades - CST34 and CST78 for clade 1 and 3, respectively. Related to the Results section ‘*Candida glabrata* has a widespread ability to acquire drug and multidrug resistance’ and STAR Methods.**

We highlight the ortholog of *Saccharomyces cerevisiae* *MAD1* for which polymorphisms in CST109 and M12 were found to affect nearby residues in the protein sequence (390 and 387, respectively). Dysfunction of this gene has been previously related to chromosome instability in *S. cerevisiae*<sup>59</sup>. Thus, these polymorphisms might be associated with higher chromosome instability resulting in lower capacity to preserve long-term drug resistance.

|          |           |       |          |           | genome sequencing   | sanger sequencing      |
|----------|-----------|-------|----------|-----------|---------------------|------------------------|
| Mutant   | Condition | Clade | Strain   | Replicate | <i>ERG3</i>         |                        |
| TGL00051 | ANI       | 1     | CST109   | 1B        |                     | -                      |
| TGL00052 | ANI       | 1     | CST109   | 1D        |                     | -                      |
| TGL00053 | ANI       | 1     | CST109   | 1F        |                     | -                      |
| TGL00054 | ANI       | 1     | CST109   | 1H        |                     | -                      |
| TGL00055 | ANI       | 1     | CST34    | 2A        | -                   |                        |
| TGL00056 | ANI       | 1     | CST34    | 2C        |                     | mis p.213 L/S          |
| TGL00057 | ANI       | 1     | CST34    | 2E        |                     | ins c.215 TC, ins p.77 |
| TGL00058 | ANI       | 1     | CST34    | 2G        | mis p.207 P/L       |                        |
| TGL00059 | ANI       | 2     | EB0911   | 3B        | mis p.122 D/Y       |                        |
| TGL00060 | ANI       | 2     | EB0911   | 3D        |                     | -                      |
| TGL00061 | ANI       | 2     | EB0911   | 3F        |                     | -                      |
| TGL00062 | ANI       | 2     | EB0911   | 3H        | -                   |                        |
| TGL00063 | ANI       | 3     | CST78    | 4A        |                     | -                      |
| TGL00065 | ANI       | 3     | CST78    | 4E        |                     | mis p.1 M/L            |
| TGL00066 | ANI       | 3     | CST78    | 4G        |                     | PTC p.67 Y/*           |
| TGL00067 | ANI       | 3     | M12      | 5B        |                     | -                      |
| TGL00068 | ANI       | 3     | M12      | 5D        |                     | mis p.265 N/K          |
| TGL00069 | ANI       | 3     | M12      | 5F        | mis p.9 D/G         | -                      |
| TGL00070 | ANI       | 3     | M12      | 5H        | -                   |                        |
| TGL00071 | ANI       | 4     | EF1237   | 6A        |                     | -                      |
| TGL00072 | ANI       | 4     | EF1237   | 6C        |                     | mis p.302 Q/K          |
| TGL00073 | ANI       | 4     | EF1237   | 6E        |                     | -                      |
| TGL00074 | ANI       | 4     | EF1237   | 6G        |                     | -                      |
| TGL00075 | ANI       | 4     | EF1620   | 7B        | -                   |                        |
| TGL00076 | ANI       | 4     | EF1620   | 7D        | mis p.267 W/R       |                        |
| TGL00077 | ANI       | 4     | EF1620   | 7F        | mis p.243 Y/C       |                        |
| TGL00078 | ANI       | 4     | EF1620   | 7H        |                     | -                      |
| TGL00079 | ANI       | 5     | F15      | 8A        |                     | -                      |
| TGL00080 | ANI       | 5     | F15      | 8C        |                     | mis p.224 T/A          |
| TGL00081 | ANI       | 5     | F15      | 8E        |                     | -                      |
| TGL00082 | ANI       | 5     | F15      | 8G        |                     | mis p.135 Q/R          |
| TGL00083 | ANI       | 5     | CBS138   | 9B        |                     | mis p.128 H/Y          |
| TGL00084 | ANI       | 5     | CBS138   | 9D        |                     | partial deletion       |
| TGL00085 | ANI       | 5     | CBS138   | 9F        | PTC p.135 Q/*       |                        |
| TGL00086 | ANI       | 5     | CBS138   | 9H        | STOP c.1094 tAg/tCg |                        |
| TGL00087 | ANI       | 6     | P352     | 10A       |                     | PTC p.239 Q/*          |
| TGL00088 | ANI       | 6     | P352     | 10C       |                     | mis p.71 P/L           |
| TGL00089 | ANI       | 6     | P352     | 10E       | -                   |                        |
| TGL00090 | ANI       | 6     | P352     | 10G       | mis p.228 S/F       |                        |
| TGL00091 | ANI       | 7     | BG2      | 11B       | mis p.300 Y/C       |                        |
| TGL00092 | ANI       | 7     | BG2      | 11D       |                     | mis p.87 R/I           |
| TGL00093 | ANI       | 7     | BG2      | 11F       |                     | mis p.300 Y/C          |
| TGL00094 | ANI       | 7     | BG2      | 11H       | PTC p.267 W/*       |                        |
| TGL00096 | ANI       | 7     | SLL2glab | 12A       |                     | mis p.225 P/T          |
| TGL00095 | ANI       | 7     | SLL2glab | 12C       |                     | mis p.301 G/D          |
| TGL00097 | ANI       | 7     | SLL2glab | 12E       |                     | mis p.225 P/T          |
| TGL00098 | ANI       | 7     | SLL2glab | 12G       |                     | PTC p.203 W/*          |

**Table S2. *ERG3* mutations. Related to Figure 7.**

Columns indicate, in this order: mutant name, evolution media, clade, strain, replicate, mutations in *ERG3* gene from genome and sanger sequencing. The variants are encoded as “type of mutation” / “molecule affected” . “position” | “reference allele” / “alternative allele”. The “type of mutation” can be: mis - missense variant, del - inframe deletion, PTC – Premature Termination Codon, FS - frameshift, ins – inframe insertion, lostSTOP – lost STOP codon, lostATG - lost START codon. The “molecule affected” can be “p” for protein and “c” for cDNA. The “reference” and “alternative” alleles correspond to amino acids or codons for proteins or cDNA alterations, respectively.



| evolution media      | ANI                     | ANI                          | ANI              | ANI                          | ANI                          | ANI                          | ANI                          | ANI                     | ANI                     | ANI                      |
|----------------------|-------------------------|------------------------------|------------------|------------------------------|------------------------------|------------------------------|------------------------------|-------------------------|-------------------------|--------------------------|
| clade                | 1                       | 2                            | 3                | 4                            | 4                            | 5                            | 5                            | 6                       | 4                       | 7                        |
| strain               | CST34                   | EB0911                       | M12              | EF1620                       | EF1620                       | CBS138                       | CBS138                       | P352                    | BG2                     | BG2                      |
| replicate            | 2G                      | 3B                           | 5F               | 7D                           | 7F                           | 9F                           | 9H                           | 10G                     | 11B                     | 11H                      |
| tested gene/fragment | FKS2 HS1<br>ERG3        | FKS1 HS1<br>FKS2 HS1<br>ERG3 | FKS2 HS1<br>ERG3 | FKS1 HS1<br>FKS2 HS1<br>ERG3 | FKS1 HS1<br>FKS2 HS1<br>ERG3 | FKS1 HS1<br>FKS2 HS1<br>ERG3 | FKS1 HS1<br>FKS2 HS1<br>ERG3 | FKS2 HS1<br>ERG3        | FKS2 HS1<br>ERG3        | FKS2 HS2<br>ERG3         |
| final mutation       | F659-<br>P207L<br>E139* | S652*<br>F659-<br>D122Y      | F659-<br>D9G     | W650*<br>F659-<br>W267R      | D632Y<br>F659L<br>Y243C      | W611*<br>L662W<br>Q135*      | F659-<br>F659L<br>lost STOP  | F659-<br>R665G<br>S228F | A651V<br>S663P<br>Y300C | R1378H<br>W267*<br>G301V |
|                      |                         | new!                         |                  |                              |                              |                              | new!                         |                         |                         | new!                     |
| ani (ug/ml)          |                         |                              |                  |                              |                              |                              |                              |                         |                         |                          |
| 0.032                | --                      | --                           | --               | --                           | --                           | --                           | --                           | --                      | --                      | --                       |
| 0.064                | --                      | --                           | --               | --                           | --                           | --                           | L662W                        | --                      | --                      | --                       |
| 0.126                | --                      | E139*                        | --               | --                           | F659-<br>W267R               | --                           | L662W                        | S228F                   | A651V                   | --                       |
| 0.256                | F659-<br>P207L<br>--    | --                           | F659-<br>D122Y   | F659-<br>D9G                 | --                           | --                           | L662W                        | --                      | A651V                   | --                       |
|                      |                         |                              |                  |                              |                              |                              |                              | lost STOP               |                         | G301V                    |

**Table S3. Trajectory of final *FKS* and *ERG3* mutations. Related to Figure 7.**

Rows indicate, in this order: evolution media, clade, strain, replicate, tested gene/fragment, final mutation, and concentrations of anidulafungin ( $\mu\text{g/ml}$ ) corresponding to intermediate glycerol stocks (isolated single colonies) of tested trajectories. Mutations that were not found at the finalization of the evolution experiment are marked as 'new'.

| passages | drug increase | fluconazole (µg/mL) | anidulafungin (µg/mL) |
|----------|---------------|---------------------|-----------------------|
|          |               | 0                   | 0                     |
|          |               | 0                   | 0                     |
| 1        |               | 4                   | 0.016                 |
| 2        | 1             | 4                   | 0.016                 |
| 3        |               | 8                   | 0.032                 |
| 4        | 2             | 8                   | 0.032                 |
| 5        |               | 16                  | 0.064                 |
| 6        | 3             | 16                  | 0.064                 |
| 7        |               | 32                  | 0.128                 |
| 8        | 4             | 32                  | 0.128                 |
| 9        |               | 64                  | 0.256                 |
| 10       | 5             | 64                  | 0.256                 |
| 11       |               | 96                  | 0.512                 |
| 12       | 6             | 96                  | 0.512                 |
| 13       |               | 128                 | 1.024                 |
| 14       | 7             | 128                 | 1.024                 |
| 15       |               | 160                 | 2.048                 |
| 16       | 8             | 160                 | 2.048                 |
| 17       |               | 192                 | 4.096                 |
| 18       | 9             | 192                 | 4.096                 |

**Table S4. Information on drugs' concentrations used in the evolution experiments. Related to Figure 1.**

Columns indicate, in this order: number of passages, number of drug increases and corresponding fluconazole and anidulafungin concentrations (µg/mL).

genome rearrangements

| name          | sequence                   |
|---------------|----------------------------|
| ChrF_1_F      | GTAGGACAAAGAGGCGGTGA       |
| ChrF_1_R      | TCTACGCTGCTGCATGAGAC       |
| ChrF_2_F      | CCCAGACAATGGGATGAAAT       |
| ChrF_2_del_R  | TATCATGTGACAGCGTCTGC       |
| ChrF_3_R      | GTGTTGGCAAAGGTGACTT        |
| ChrD_1_F      | CACCAAAGGAAAGGACAAGG       |
| ChrD_1_R      | CCCTGTTGGTGGTCATTTTT       |
| ChrL_1_F      | TCGCATATGCATTTTCATCGT      |
| ChrL_1_R      | AACTGCCTCCAACACTTTCG       |
| ChrDL_1_F     | CAGGTCAAATACGTTTCCCATAA    |
| ChrDL_1_del_R | TTTCATTTGTTATTGAATATCTTTGC |
| ChrDL_2_R     | CCAGCAGGAACCTATCAAGG       |
| ChrG_1_F      | GAAGGTATCGCTAAGATTGCTTC    |
| ChrG_1_R      | GACCAATTGTTGATAGTTGTGTG    |
| ChrM_1_F      | TTGCGATAGAAGCTTTCCTACA     |
| ChrM_1_R      | TCCGATGTGCCATCAATCTA       |
| revChrG_1_F   | CCAATTGTTGATAGTTGTGTGTG    |
| revChrM_1_R   | TCGATGAGTCCATGAAAAGAAA     |
| ChrG_2_F      | AAGAGGTGAGGGAGGGAGAA       |
| ChrG_2_del_R  | GGGACTAAGCTGATACACGAAGA    |
| ChrG_3_R      | GGCTTGACCATTCTGTTGGT       |
| ChrE_1_F      | TCTGCACCACGGTAGAAAG        |
| ChrE_1_R      | GATGATTGCAAGGAAGAAGAA      |
| ChrJ_1_F      | CTGAATAAGGGTTGCGTGCT       |
| ChrJ_1_R      | ATGAGGGCCCCTGTCTTTAC       |
| revChrE_1_F   | ATGAGGGCCCCTGTCTTTAC       |
| ERG3_1_FWD    | TTGCATTTAGATAACCTACAGC     |
| ERG3_1_REV    | CAGTGCAGCCATCTGTGAG        |
| ERG3_2_FWD    | TCCCTCTTGACTGTCCCTTG       |
| ERG3_2_REV    | AAAGTAATGTGTGCGCGAGA       |
| FKS1_HS1_FWD  | CCATTGGGTGGTCTGTTACG       |
| FKS1_HS1_REV  | GATTGGGCAAAGAAAGAAATACGAC  |
| FKS1_HS2_FWD  | GGTATTTCAAAGGCTCAAAAGGG    |
| FKS1_HS2_REV  | ATGGAGAGAACAGCAGGGCG       |
| FKS2_HS1_FWD  | GTGCTCAACATTTATCTCGTAGG    |
| FKS2_HS1_REV  | CAGAATAGTGTGGAGTCAAGACG    |
| FKS2_HS2_FWD  | CGTAGACCGTTTCTTGACTTC      |
| FKS2_HS2_REV  | CTTGCCAATGTGCCACTG         |

|                                                                          |                  |                                                                                                                                                                  |
|--------------------------------------------------------------------------|------------------|------------------------------------------------------------------------------------------------------------------------------------------------------------------|
| CRISPR                                                                   |                  |                                                                                                                                                                  |
| ERG3                                                                     | crRNA_ERG3_1     | /AltR1/rGrA rArArA rCrGrU rArGrG rArCrA rArArG rArGrG rGrUrU rUrUrA rGrArG rCrUrA rUrGrC rU/AltR2/                                                               |
|                                                                          | crRNA_ERG3_2     | /AltR1/rUrC rUrGrU rCrGrA rArGrA rCrGrA rArArA rCrGrU rGrUrU rUrUrA rGrArG rCrUrA rUrGrC rU/AltR2/                                                               |
|                                                                          | donor_ERG3       | /Alt-R-HDR1/T*G* GTT CTT CAA GTA TTT TGG ATG GTT GAA GAT AGT TCT GTA GAA GAC GAA AAC GTA TGA CAA AGA GGC GGT GAT CAG GTA CAA TAG CAG ACC GAA GA*C* G/Alt-R-HDR2/ |
| LongFragmentERG3                                                         | FL1_FWD          | TCCTCGACCAACAGACCATC                                                                                                                                             |
|                                                                          | FL1_REV          | TGTCGAGACTAGTAGCGGG                                                                                                                                              |
| 1. FLKI_ERG3                                                             | 1_flank_ERG3_FWD | TCCTCGACCAACAGACCATC                                                                                                                                             |
|                                                                          | 1_REV            | gtcgacctgcagcgtacgAATGAGAACCCAGGTCAGCAC                                                                                                                          |
| 2. NAT1(for DNA donor constructs)                                        | 2_NAT1_FWD       | GTGCTGACCTGGGTTCTCATTCgtacgctgcaggtcgac                                                                                                                          |
|                                                                          | 2_NAT1_REV       | TTAATTTGTTGCCATAAAAAATctacgagaccgacaccg                                                                                                                          |
| 3. FLKII                                                                 | 3_FLKII_FWD      | cggtgctggtctcgtagATTTTTTATGGCAACAAATTA                                                                                                                           |
|                                                                          | 3_FLKII_REV      | TGACTGGCACTTCGACCTT                                                                                                                                              |
| check the fusion                                                         | inside_ERG3_FWD  | TCCCTCTTGACTGTCCCTTG                                                                                                                                             |
|                                                                          | inside_NAT1_REV  | caaccacaatgaccgacac                                                                                                                                              |
|                                                                          | inside_NAT1_FWD  | gtgatttgctggttcggt                                                                                                                                               |
|                                                                          | flank_ERG3_REV   | GTGGAGGCGAGGAGTAGAAA                                                                                                                                             |
| after the transformation – in the correct place                          | out_REV          | GGTAGTCAGCAAGGTCTCGT                                                                                                                                             |
|                                                                          | inside_NAT1_FWD  | gtgatttgctggttcggt                                                                                                                                               |
| double check if NAT inside, primers down and upstream of the <i>NAT1</i> | inside_ERG3_FWD  | TCCCTCTTGACTGTCCCTTG                                                                                                                                             |
|                                                                          | flank_ERG3_REV   | GTGGAGGCGAGGAGTAGAAA                                                                                                                                             |

**Table S5. Information about all the oligos used in the study. Related to Figures: 3, 7, S2, S3 and STAR Methods.**

The table includes primers used to confirm the GR, investigate *ERG3* gene and *FKS1* and *FKS2* fragments as well as crRNAs, ordered *ERG3* fragment and primers used in CRISPR-Cas9 transformations. Lowercase letters in primers used in CRISPR Cas9 transformations indicate the sequences in *NAT1* gene.

## Supplemental References

- S1. Waterhouse, A., Bertoni, M., Bienert, S., Studer, G., Tauriello, G., Gumienny, R., Heer, F.T., de Beer, T.A.P., Rempfer, C., Bordoli, L., et al. (2018). SWISS-MODEL: homology modelling of protein structures and complexes. *Nucleic Acids Res.* *46*, W296–W303.
- S2. Lockhart, S.R., Etienne, K.A., Vallabhaneni, S., Farooqi, J., Chowdhary, A., Govender, N.P., Colombo, A.L., Calvo, B., Cuomo, C.A., Desjardins, C.A., et al. (2017). Simultaneous Emergence of Multidrug-Resistant *Candida auris* on 3 Continents Confirmed by Whole-Genome Sequencing and Epidemiological Analyses. *Clin. Infect. Dis.* *64*, 134–140.
- S3. Berkow, E.L., Manigaba, K., Parker, J.E., Barker, K.S., Kelly, S.L., and Rogers, P.D. (2015). Multidrug Transporters and Alterations in Sterol Biosynthesis Contribute to Azole Antifungal Resistance in *Candida parapsilosis*. *Antimicrob. Agents Chemother.* *59*, 5942–5950.
- S4. Tan, J., Zhang, J., Chen, W., Sun, Y., Wan, Z., Li, R., and Liu, W. (2015). The A395T mutation in ERG11 gene confers fluconazole resistance in *Candida tropicalis* causing candidemia. *Mycopathologia* *179*, 213–218.
- S5. Pfaller, M.A., Diekema, D.J., Turnidge, J.D., Castanheira, M., and Jones, R.N. (2019). Twenty Years of the SENTRY Antifungal Surveillance Program: Results for *Candida* Species From 1997–2016. *Open Forum Infectious Diseases* *6*, S79–S94.
- S6. Ferrari, S., Ischer, F., Calabrese, D., Posteraro, B., Sanguinetti, M., Fadda, G., Rohde, B., Bauser, C., Bader, O., and Sanglard, D. (2009). Gain of function mutations in CgPDR1 of *Candida glabrata* not only mediate antifungal resistance but also enhance virulence. *PLoS Pathog.* *5*, e1000268.
- S7. Tsai, H.-F., Sammons, L.R., Zhang, X., Suffis, S.D., Su, Q., Myers, T.G., Marr, K.A., and Bennett, J.E. (2010). Microarray and molecular analyses of the azole resistance mechanism in *Candida glabrata* oropharyngeal isolates. *Antimicrob. Agents Chemother.* *54*, 3308–3317.
- S8. Spettel, K., Barousch, W., Makristathis, A., Zeller, I., Nehr, M., Selitsch, B., Lackner, M., Rath, P.-M., Steinmann, J., and Willinger, B. (2019). Analysis of antifungal resistance genes in *Candida albicans* and *Candida glabrata* using next generation sequencing. *PLoS One* *14*, e0210397.
- S9. Zhu, J., Pavelka, N., Bradford, W.D., Rancati, G., and Li, R. (2012). Karyotypic determinants of chromosome instability in aneuploid budding yeast. *PLoS Genet.* *8*, e1002719.
- S10. Skrzypek, M.S., Binkley, J., Binkley, G., Miyasato, S.R., Simison, M., and Sherlock, G. (2017). The *Candida* Genome Database (CGD): incorporation of Assembly 22, systematic identifiers and visualization of high throughput sequencing data. *Nucleic Acids Res.* *45*, D592–D596.
